# Supplementary material for: Bi-axially oriented ternary polypropylene composite film with enhanced energy storage property at elevated temperature
Source: Royal Society of Chemistry journal article supplement (doi:10.1039/d4ta05664g), 2024-01-01
Supplement: d4ta05664g1.pdf [file d4ta05664g1.pdf]

Electronic Supplementary Material

# **Biaxially Oriented Ternary Polypropylene Composite Film with Enhanced Energy Storage Property at Elevated Temperature**

Wenfeng Liu<sup>\*a</sup>, Zhiyuan Li<sup>a</sup>, Hongbo Liu<sup>a</sup>, Yihan Zhou<sup>a</sup>, Jiakai Zeng<sup>a</sup>, Yi Zhao<sup>a</sup>, Lu Cheng<sup>a</sup>, Yao Zhou<sup>a</sup>, Shengtao Li<sup>a</sup>.

<sup>a</sup> a State Key Laboratory of Electrical Insulation and Power Equipment, School of Electrical Engineering, Xi'an Jiaotong University, Xi'an 710049, China

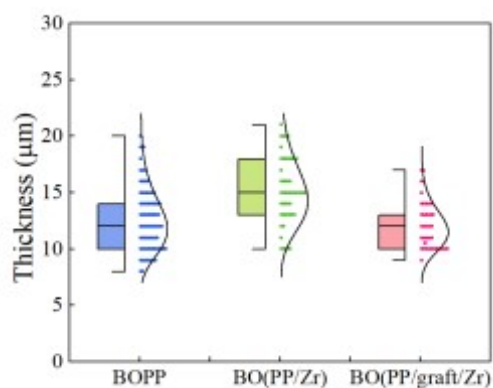

Figure. S1 The thickness of composites films after biaxial orientation

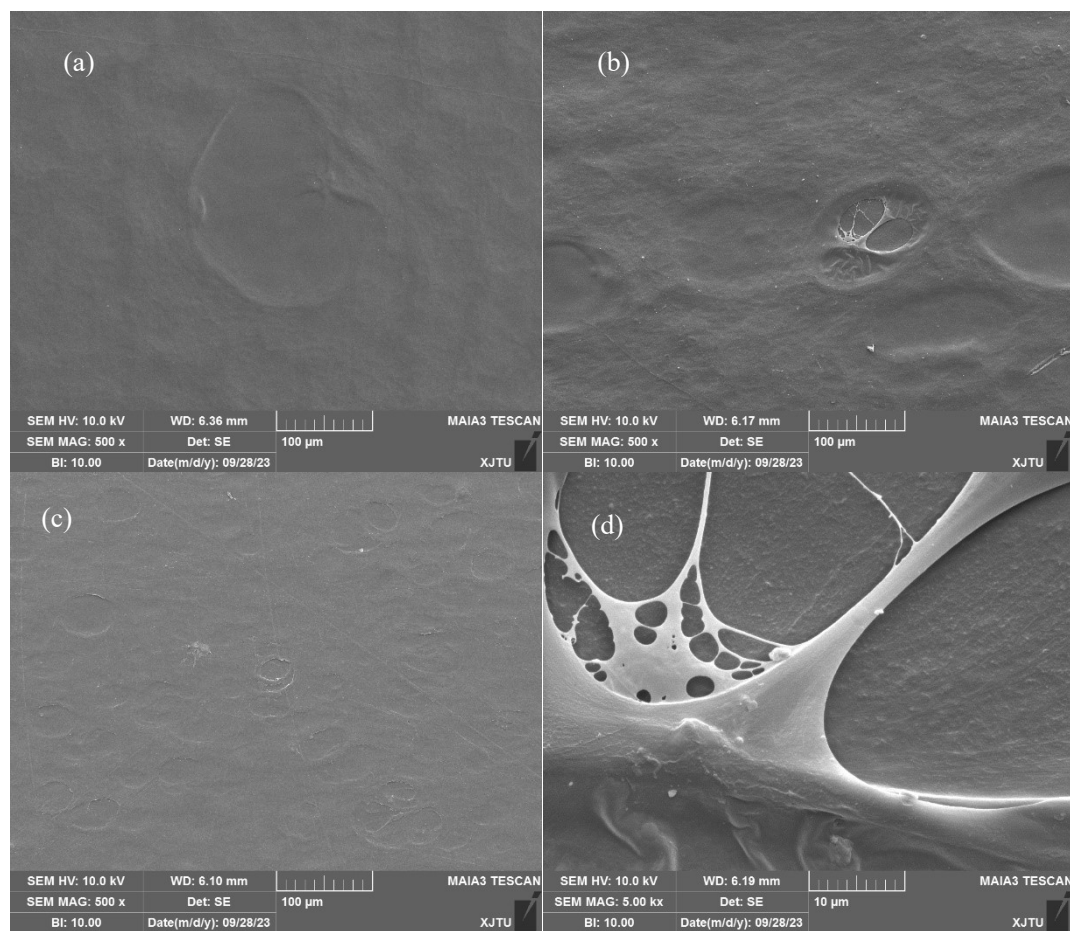

Figure. S2 The original image of Fig.2(d): (a) BOPP, (b) BO(PP/Zr), (c) BP(PP/AA/Zr) and (d) the partial enlarged image of BO(PP/Zr).

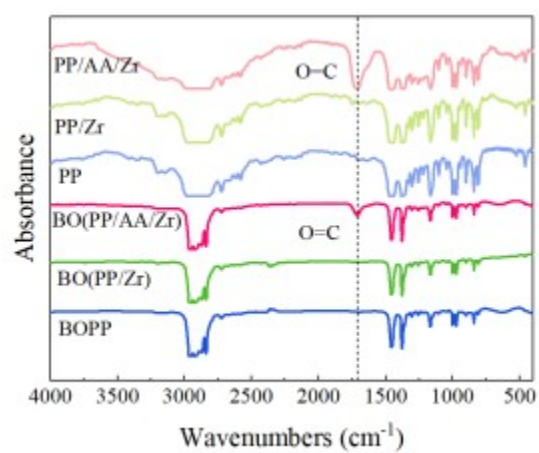

Figure. S3 FTIR spectra

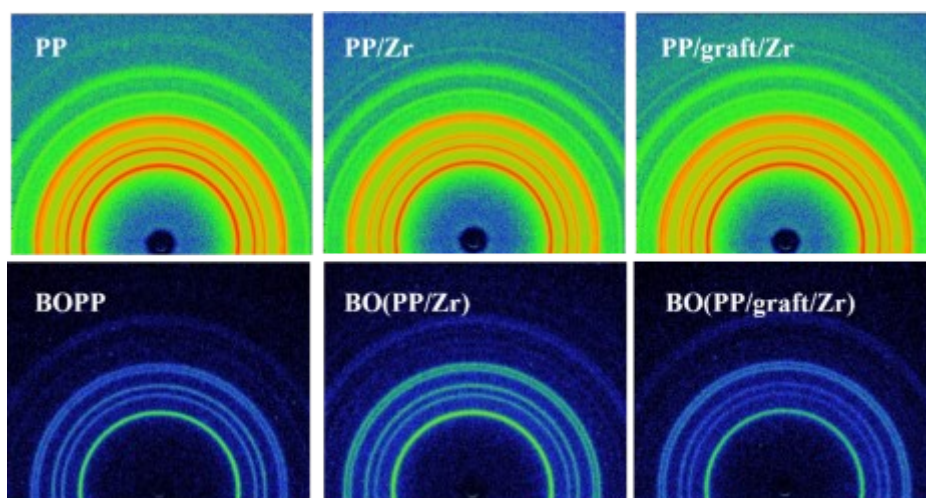

Figure. S4 2D-WAXD patterns of all samples

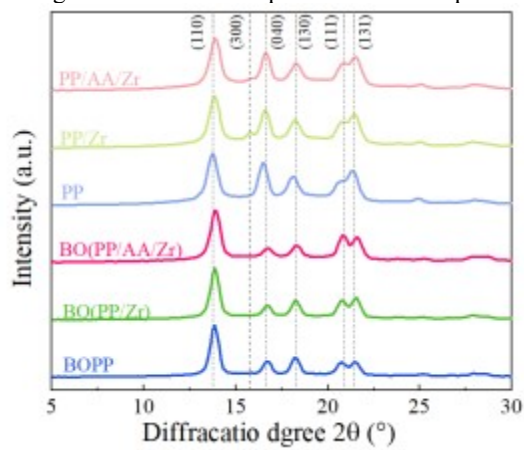

Figure. S5 1D-WAXD curves by integrating the 2D-WAXD pattern.

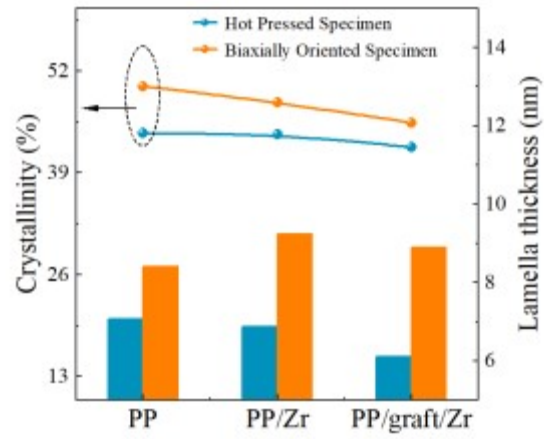

Figure. S6 Crystallinity and lamellar size of specimens before and after biaxial stretching.

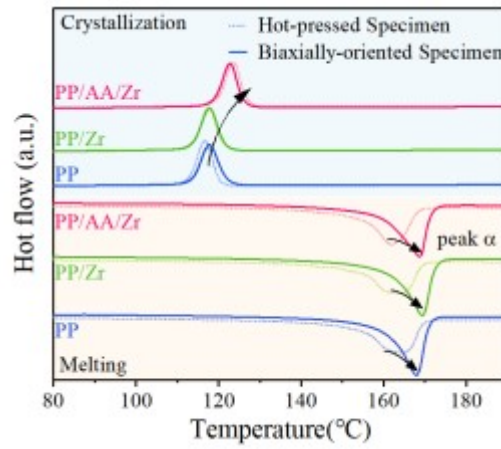

Figure. S7 DSC temperature spectra.

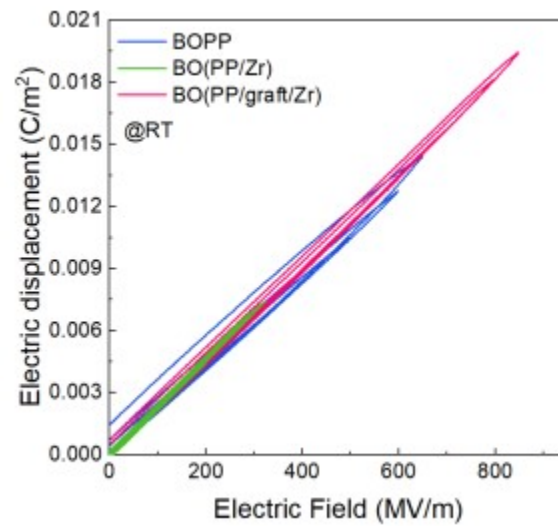

Figure. S8 The electric hysteresis loops of biaxially oriented films at room temperature.

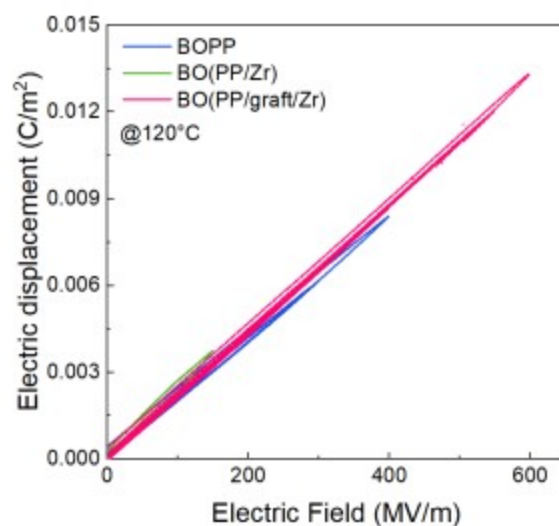

Figure. S9 The electric hysteresis loops of biaxially oriented films at  $120^\circ\text{C}$ .

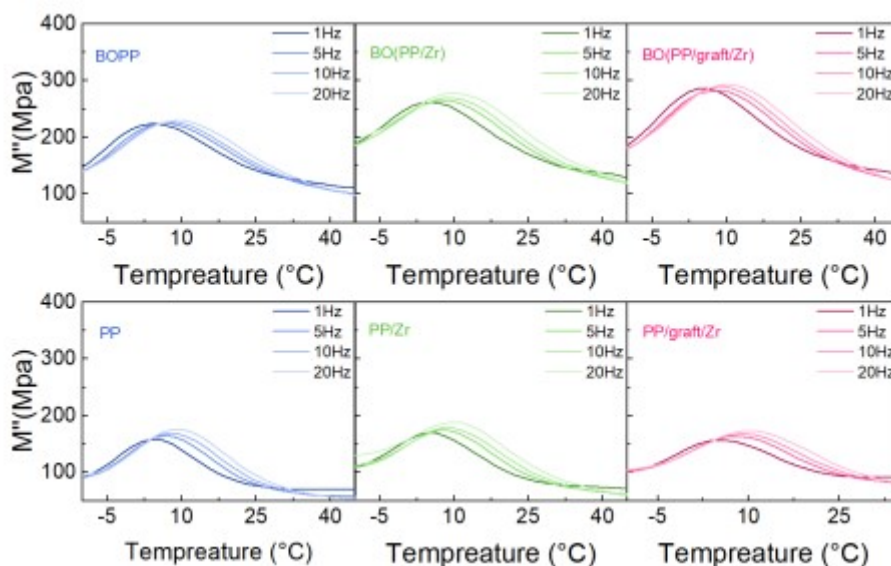

Figure. S10 Loss modulus ( $M''$ ) of all the samples films measured by DMA at the different frequencies of 1, 5, 10 and 20 Hz.
